# Supplementary material for: Differential detection of strong acids in weak acids: a combination of a benzimidazole-carbazole backbone with AIE luminophores as highly sensitive and selective turn-on fluorescent probes
Source: Royal Society of Chemistry journal article supplement (doi:10.1039/d2nj01226j), 2022-01-01
Supplement: d2nj01226j1.pdf [file d2nj01226j1.pdf]

## Electronic Supplementary Information (ESI)

### **Differential Detection of Strong-Acids in Weak-Acids: A combination of Benzimidazole-carbazole backbone with AIE luminophores as highly sensitive and selective turn-on fluorescent probes**

Pei-Chi Lin,<sup>†a</sup> Yu-Ting Lin,<sup>†a</sup> Kuan-Ting Liu,<sup>a</sup> Meng-Sin Chen,<sup>a</sup> Yong-Yun Zhang,<sup>a</sup> Jie-Cheng Li<sup>b</sup> and Man-kit Leung<sup>\*a</sup>

<sup>a</sup> *Department of Chemistry and Advanced Research Center for Green Materials Science and Technology, National Taiwan University, Taipei 10617, Taiwan*

<sup>b</sup> *Chang Chun Plastics Co., Ltd. Kaohsiung Factory, Kaohsiung 81469, Taiwan*

### **Contents**

|                                                                                                                                                           |            |
|-----------------------------------------------------------------------------------------------------------------------------------------------------------|------------|
| <b><sup>1</sup>H and <sup>13</sup>C NMR spectra of each intermediate compound, <i>o</i>-BzcDPE, and <i>p</i>-BzcDPE</b>                                   | <b>S2</b>  |
| <b>HRMS of each intermediate compound, <i>o</i>-BzcDPE, and <i>p</i>-BzcDPE</b>                                                                           | <b>S10</b> |
| <b>Crystal data of <i>o</i>-BzcDPE, <i>p</i>-BzcDPE, and <i>p</i>-BzcDPE+HCl</b>                                                                          | <b>S14</b> |
| <b>NMR spectra assignments of <i>o</i>-BzcDPE</b>                                                                                                         | <b>S17</b> |
| <b>Oscillator strength data for DFT studies</b>                                                                                                           | <b>S19</b> |
| <b>UV-Vis absorption of <i>o</i>-BzcDPE, <i>p</i>-BzcDPE, <i>o</i>-BzcDPE+H<sup>+</sup>, and <i>p</i>-BzcDPE+H<sup>+</sup> in different solvents</b>      | <b>S20</b> |
| <b>Solvato-fluorochromism of <i>o</i>-BzcDPE, <i>p</i>-BzcDPE, <i>o</i>-BzcDPE+H<sup>+</sup>, and <i>p</i>-BzcDPE+H<sup>+</sup> in different solvents</b> | <b>S21</b> |
| <b>Study of AIE phenomenon of <i>o</i>-BzcDPE</b>                                                                                                         | <b>S22</b> |
| <b>Optical titration of sulfuric acid</b>                                                                                                                 | <b>S23</b> |
| <b>Optical titration of PFOA</b>                                                                                                                          | <b>S25</b> |
| <b>Time response and stability tests of <i>o</i>-BzcDPE and <i>p</i>-BzcDPE under different acid conditions</b>                                           | <b>S26</b> |
| <b>Quantum yield calculation and data of <i>o</i>-BzcDPE+H<sup>+</sup> and <i>p</i>-BzcDPE+H<sup>+</sup> in different solvent</b>                         | <b>S27</b> |

**$^1\text{H}$  and  $^{13}\text{C}$  NMR spectra of each intermediate compound, *o*-BzcDPE, and *p*-BzcDPE**

2-(2-bromophenyl)-1-phenyl-1H-benzo[d]imidazole (**1**) in  $\text{CD}_2\text{Cl}_2$  [1]

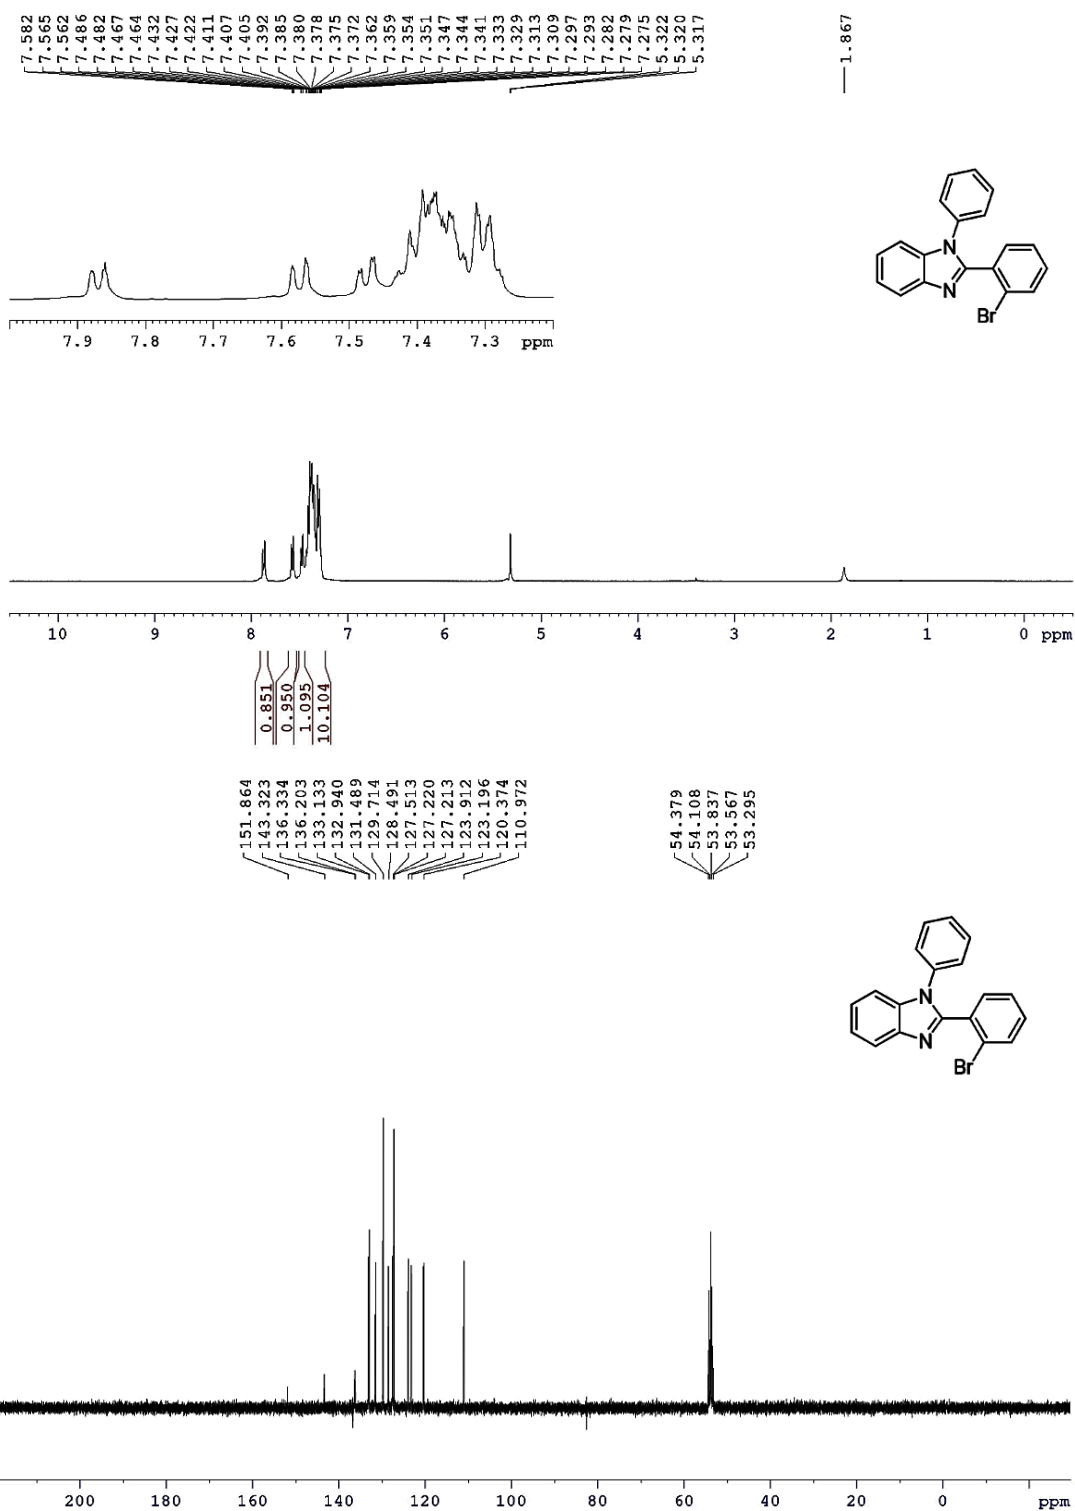

2-(4-bromophenyl)-1-phenyl-1H-benzo[d]imidazole (**2**) in CD<sub>2</sub>Cl<sub>2</sub> [1]

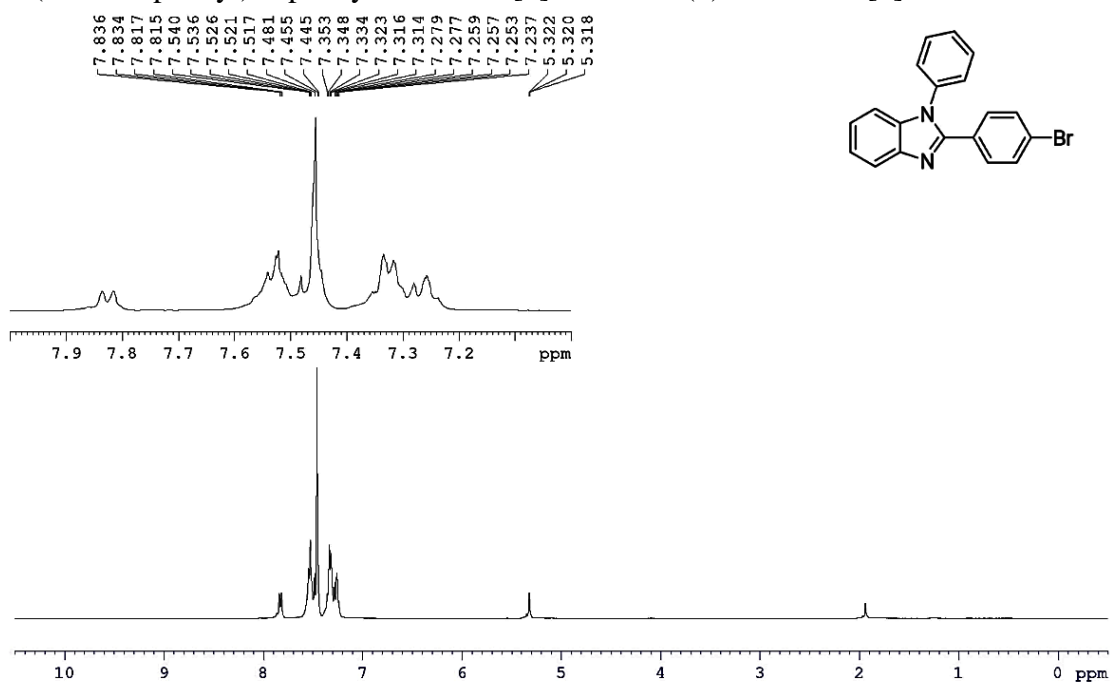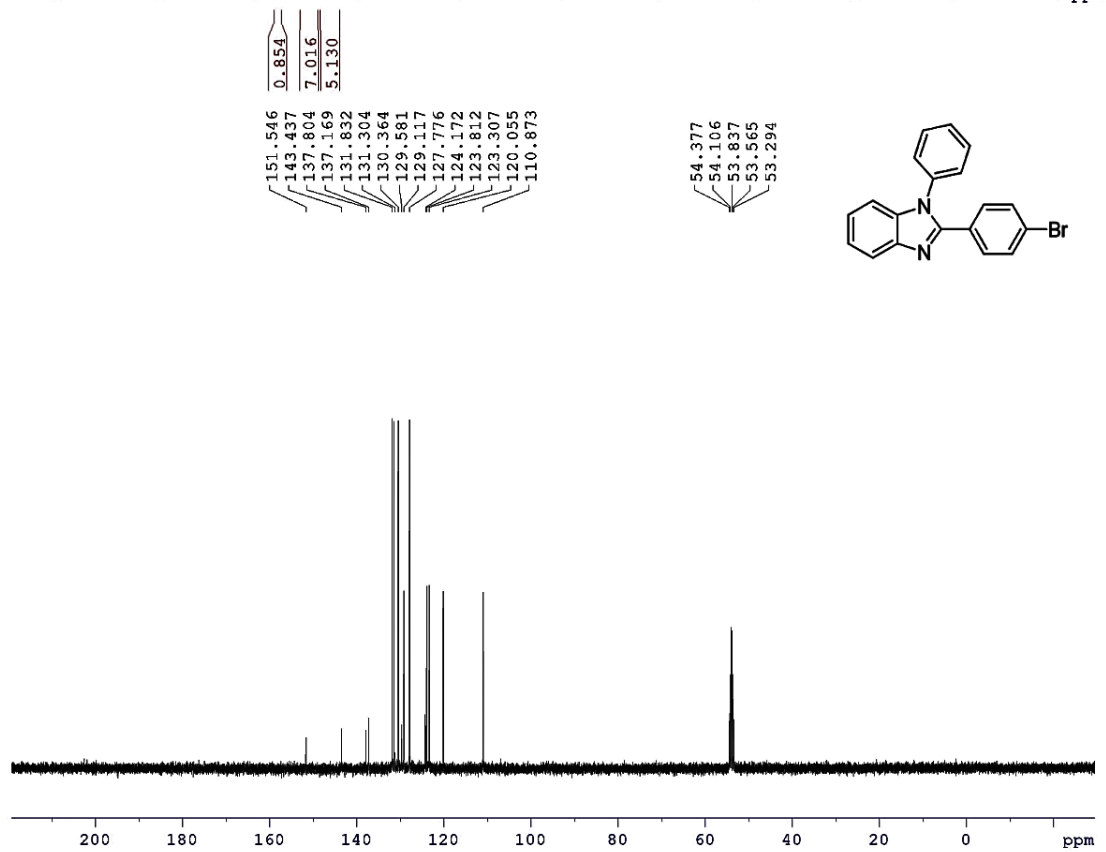

(2-bromoethene-1,1-diyl)dibenzene (**3**) in CDCl<sub>3</sub> [2]

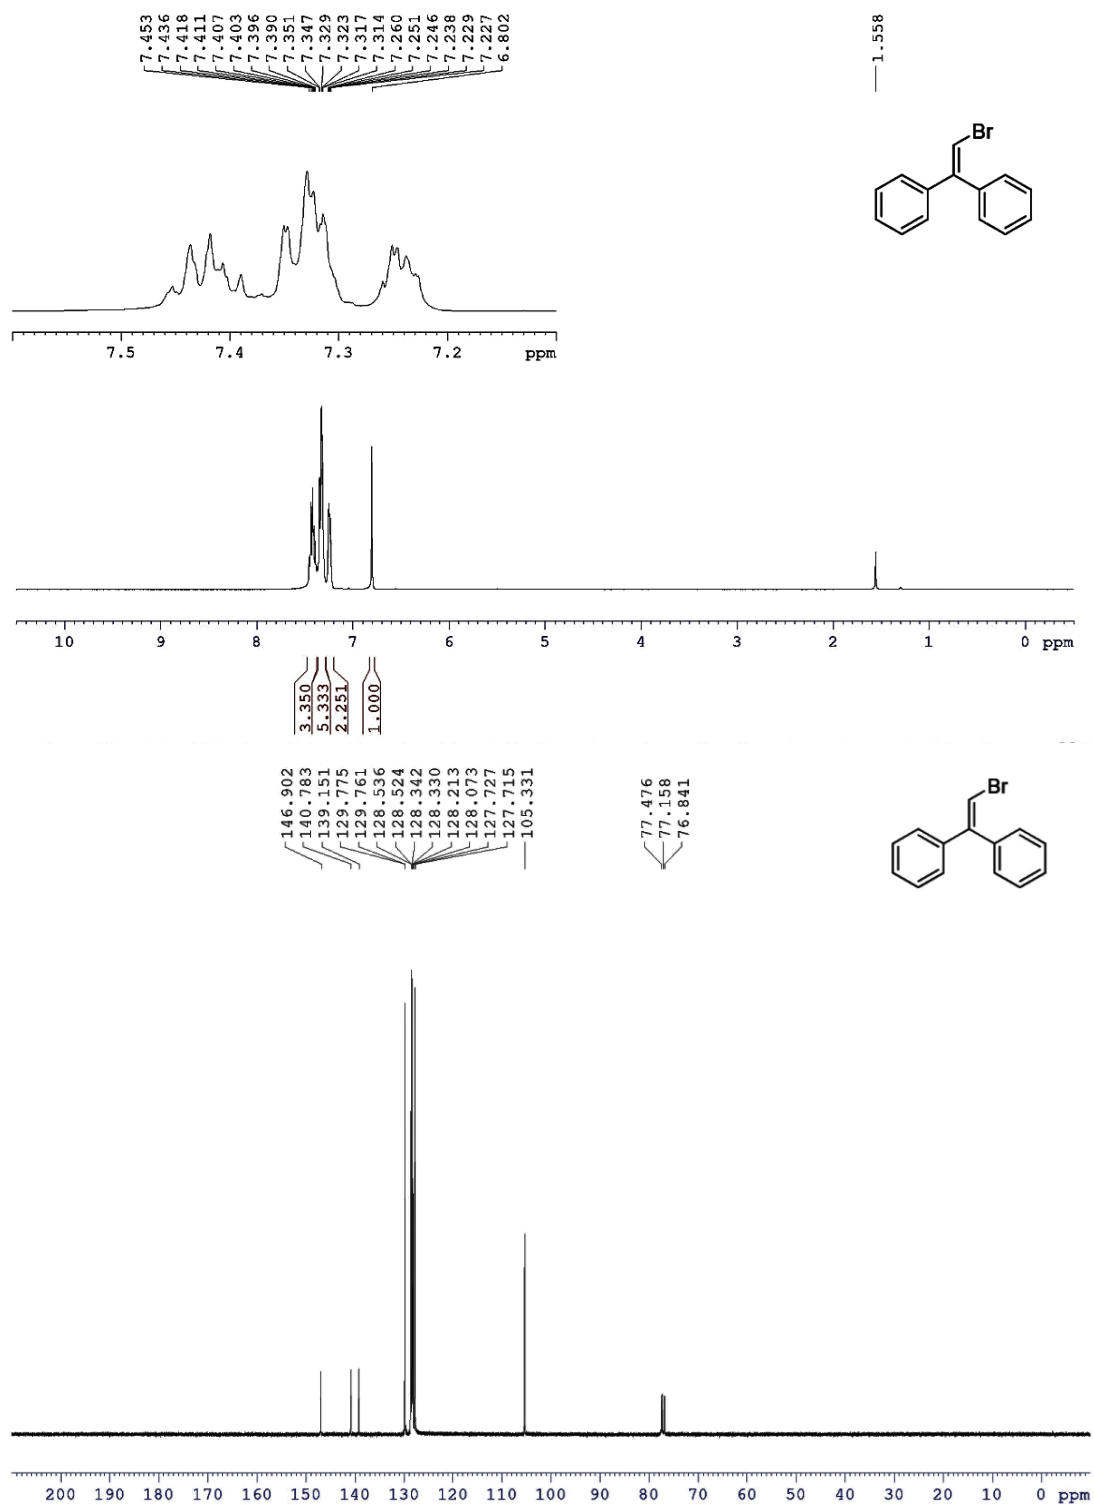

9-(2,2-diphenylvinyl)-9H-carbazole (**4**) in CD<sub>2</sub>Cl<sub>2</sub> [3]

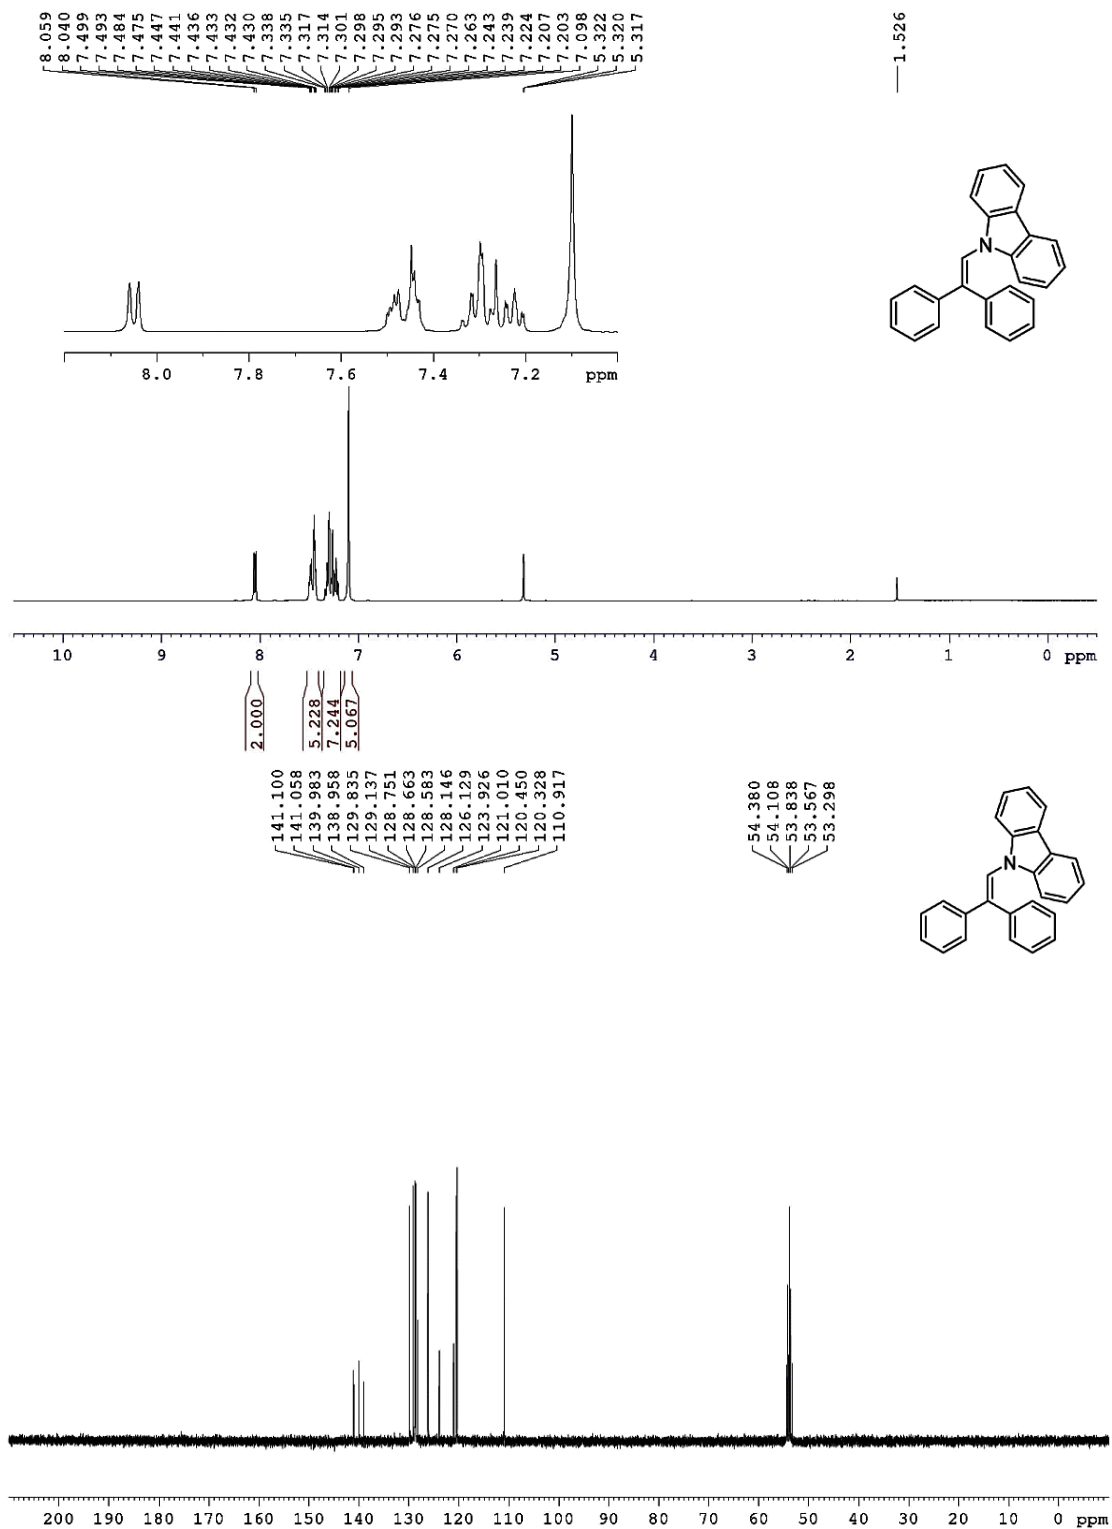

3-bromo-9-(2,2-diphenylvinyl)-9H-carbazole (**5**) in CD<sub>2</sub>Cl<sub>2</sub>

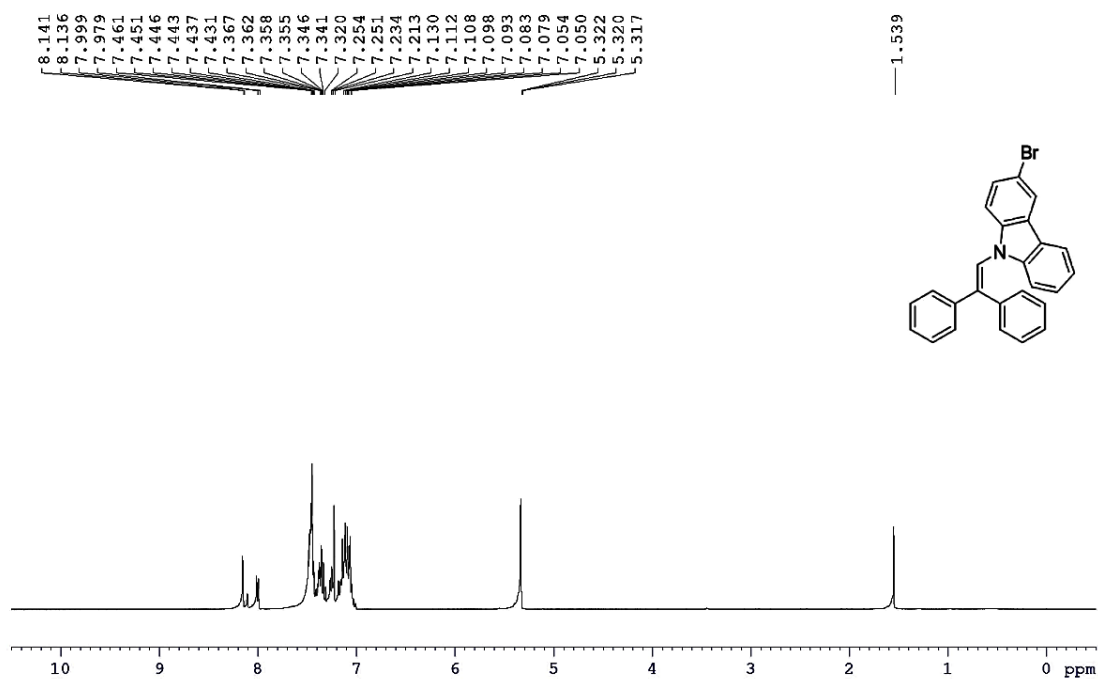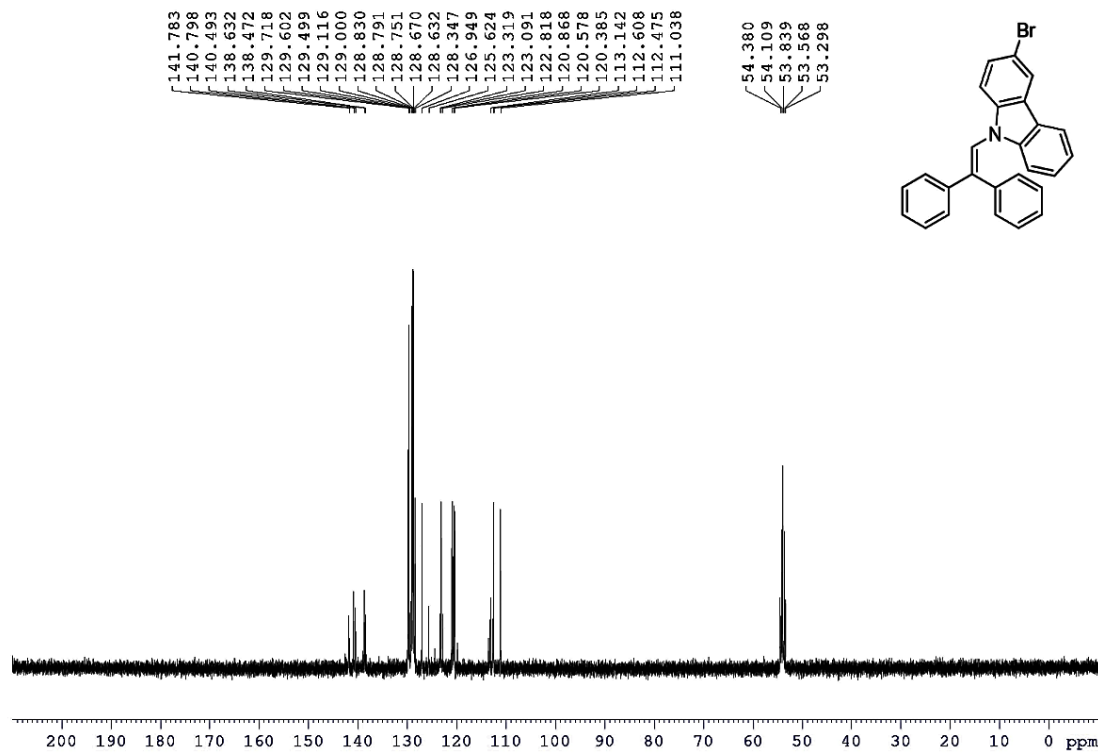

9-(2,2-diphenylvinyl)-3-(4,4,5,5-tetramethyl-1,3,2-dioxaborolan-2-yl)-9H-carbazole  
**(6)** in (CD<sub>3</sub>)<sub>2</sub>CO

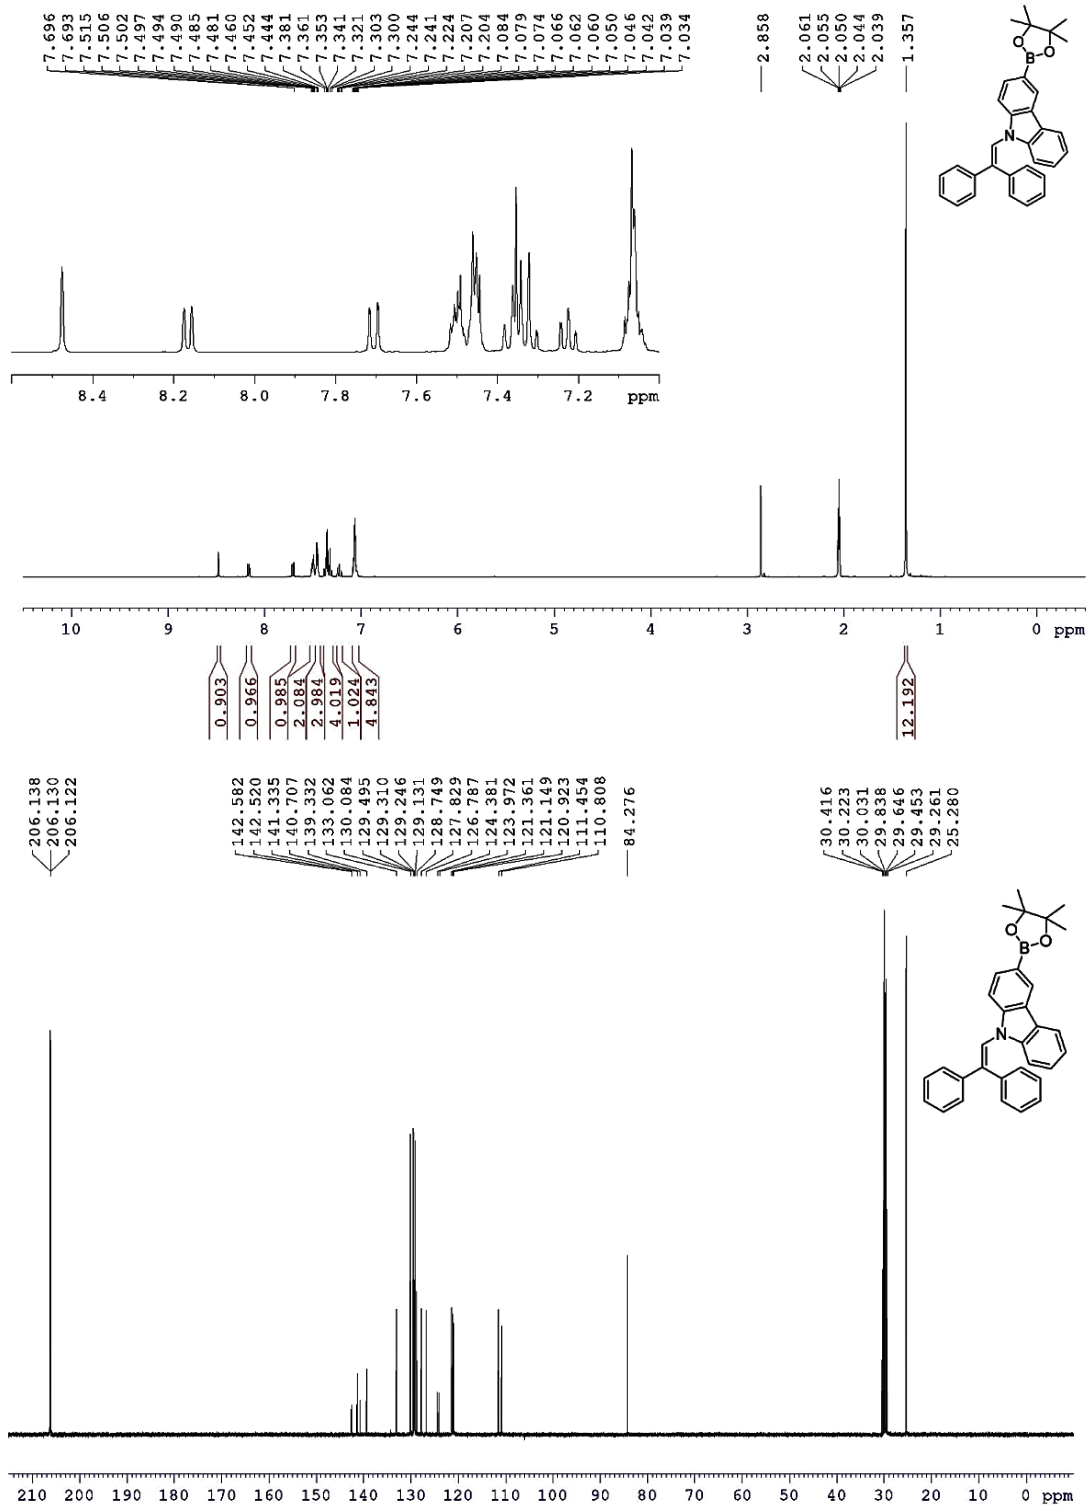

9-(2,2-diphenylvinyl)-3-(2-(1-phenyl-1H-benzo[d]imidazol-2-yl)phenyl)-9H-carbazole (*o*-BzCDPE) in CD<sub>2</sub>Cl<sub>2</sub>

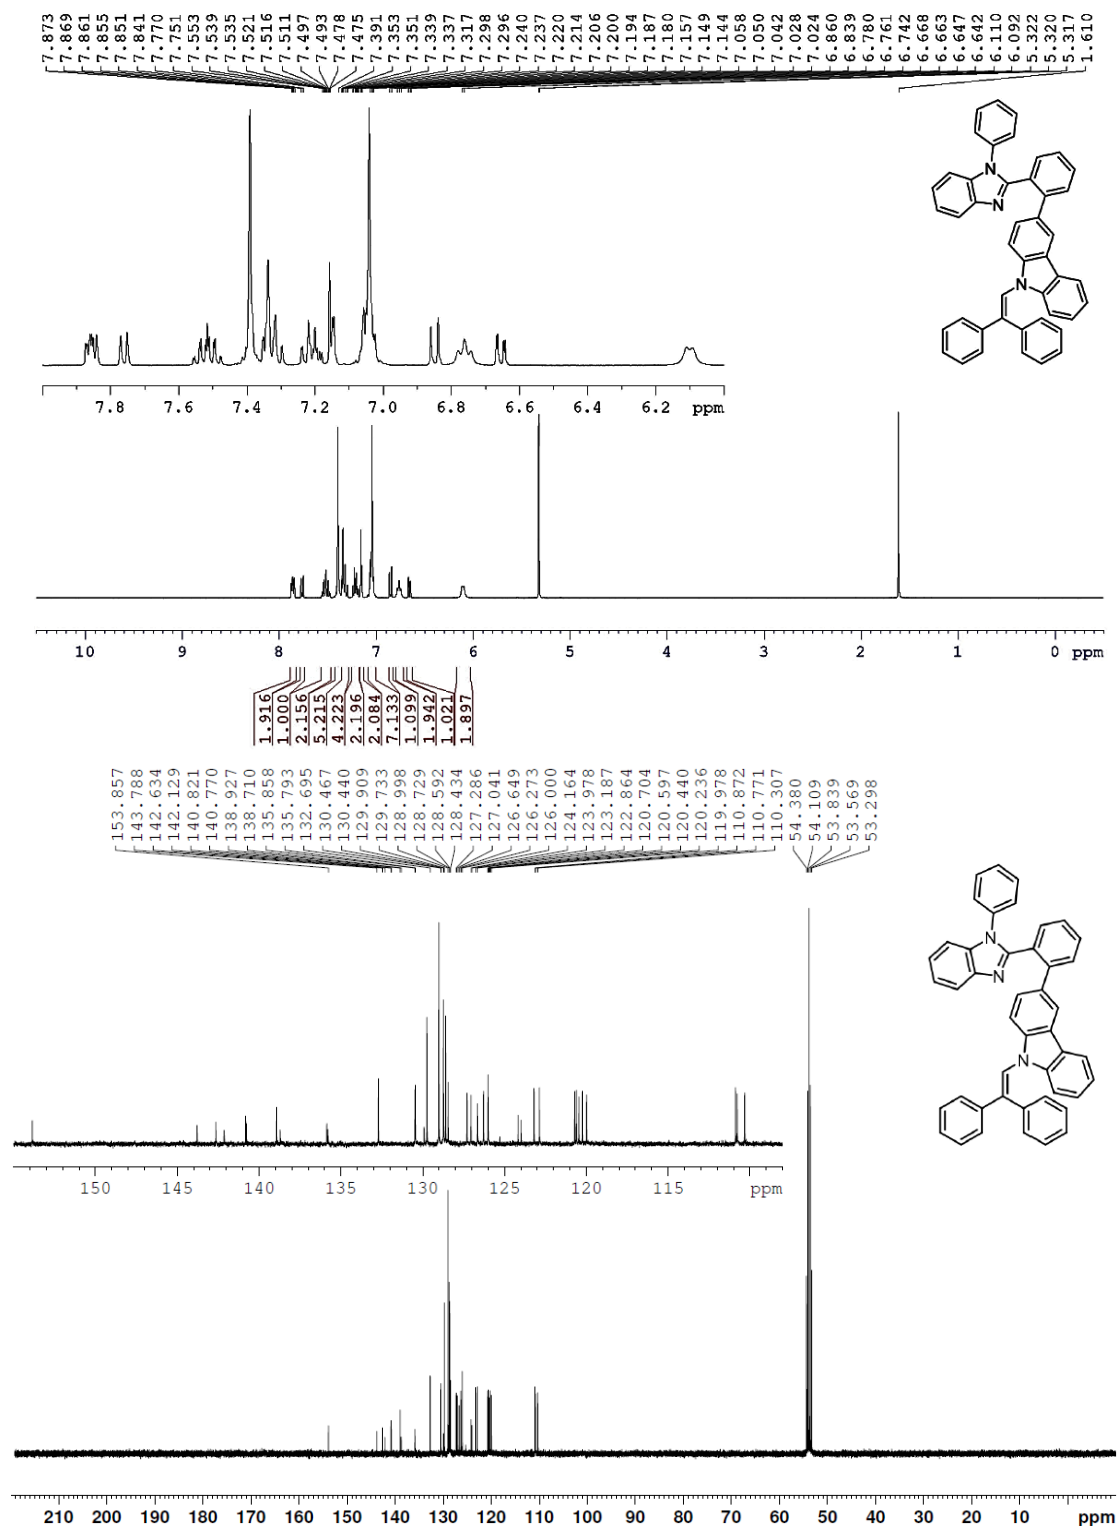



9-(2,2-diphenylvinyl)-3-(4-(1-phenyl-1H-benzo[d]imidazol-2-yl)phenyl)-9H-carbazole (**p-BzcdPE**) in CDCl<sub>3</sub>

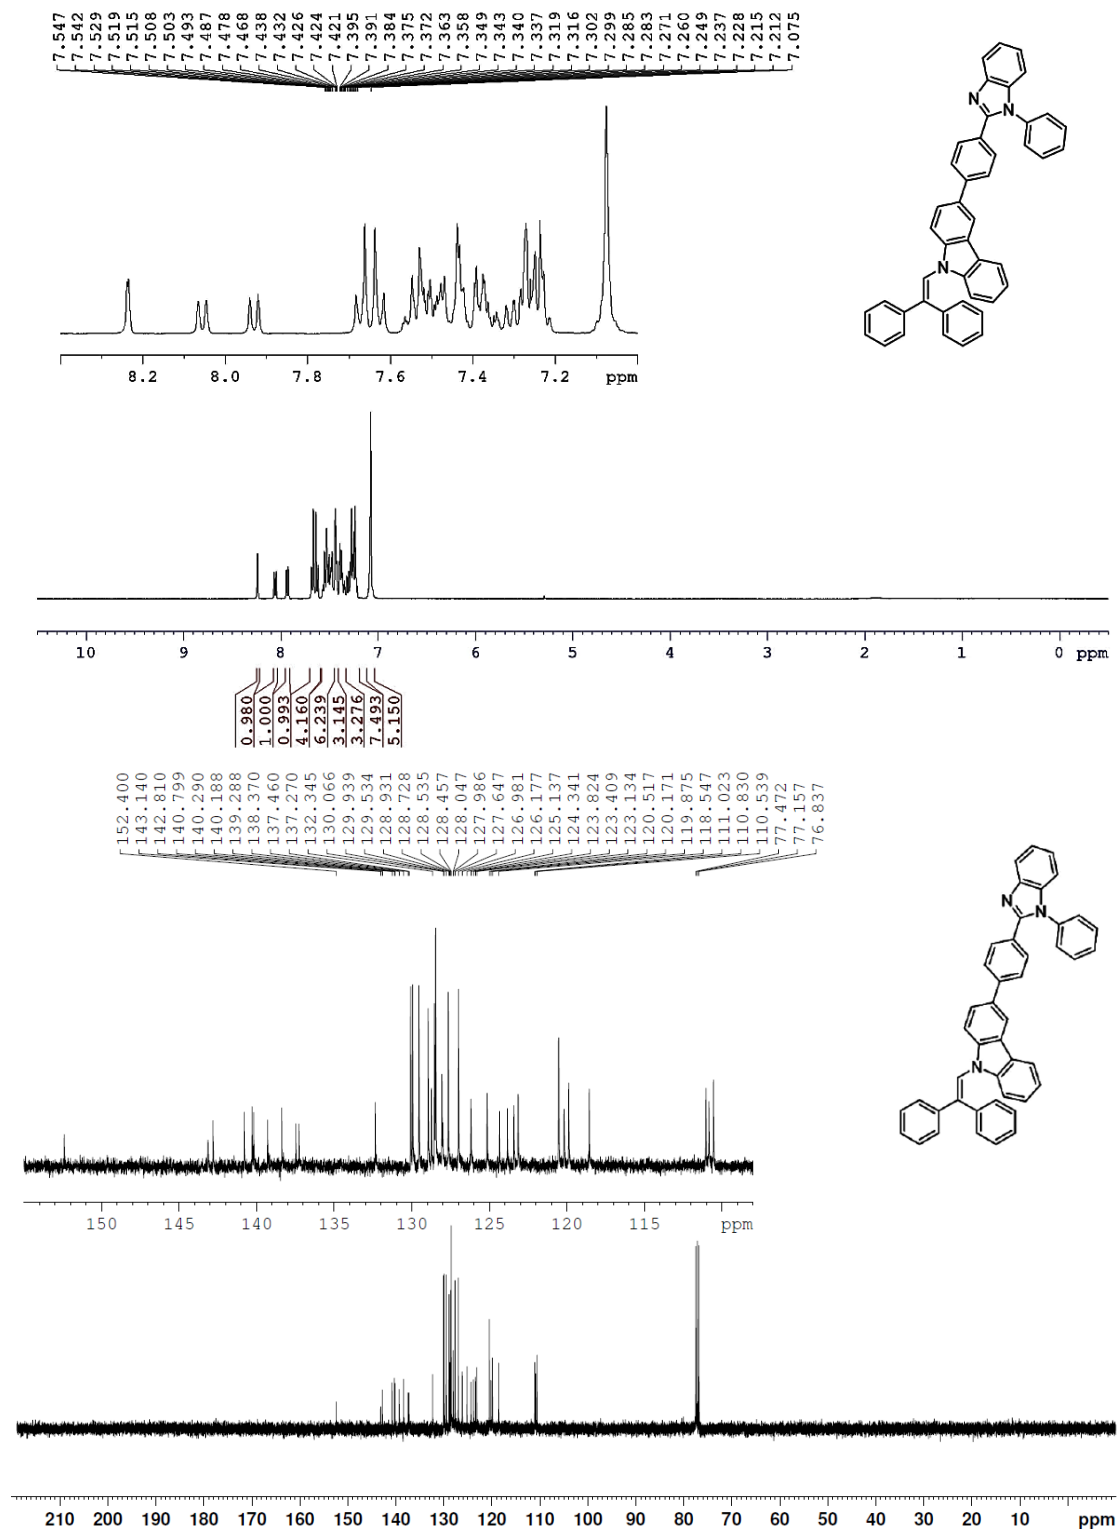

**HRMS of each intermediate compound, *o*-BzcdPE, and *p*-BzcdPE**

**2-(2-bromophenyl)-1-phenyl-1H-benzo[d]imidazole (1)**

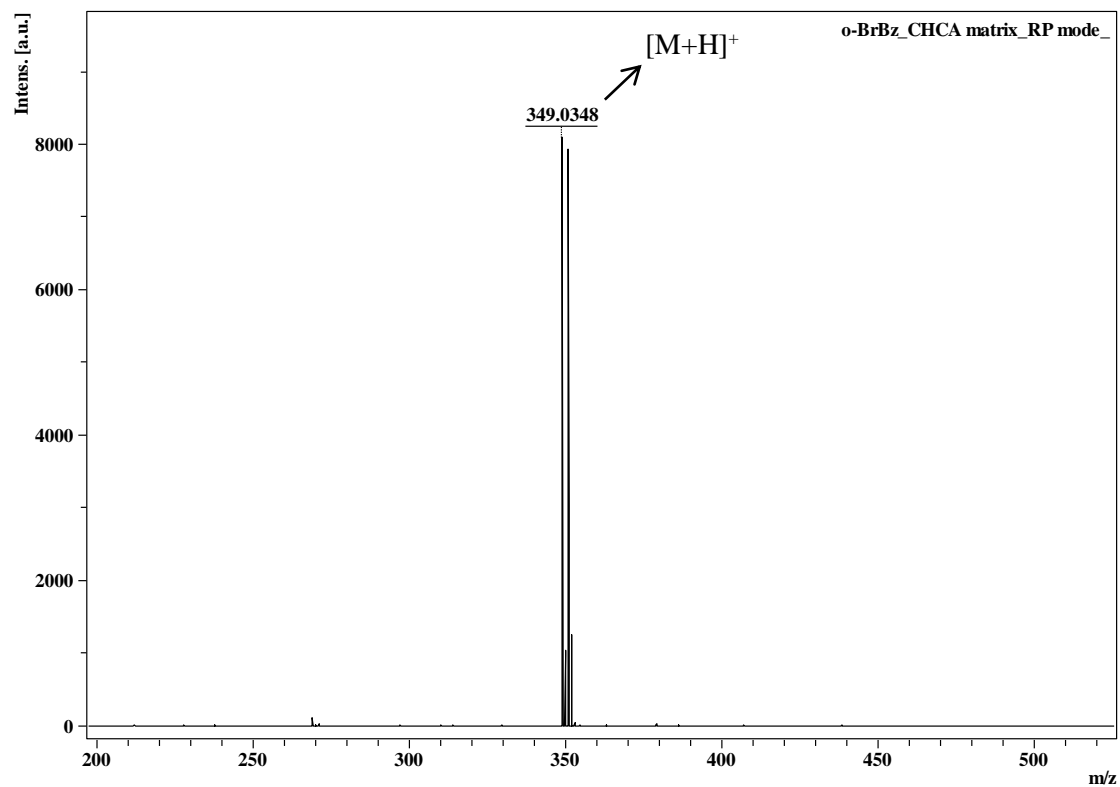

**2-(4-bromophenyl)-1-phenyl-1H-benzo[d]imidazole (2)**

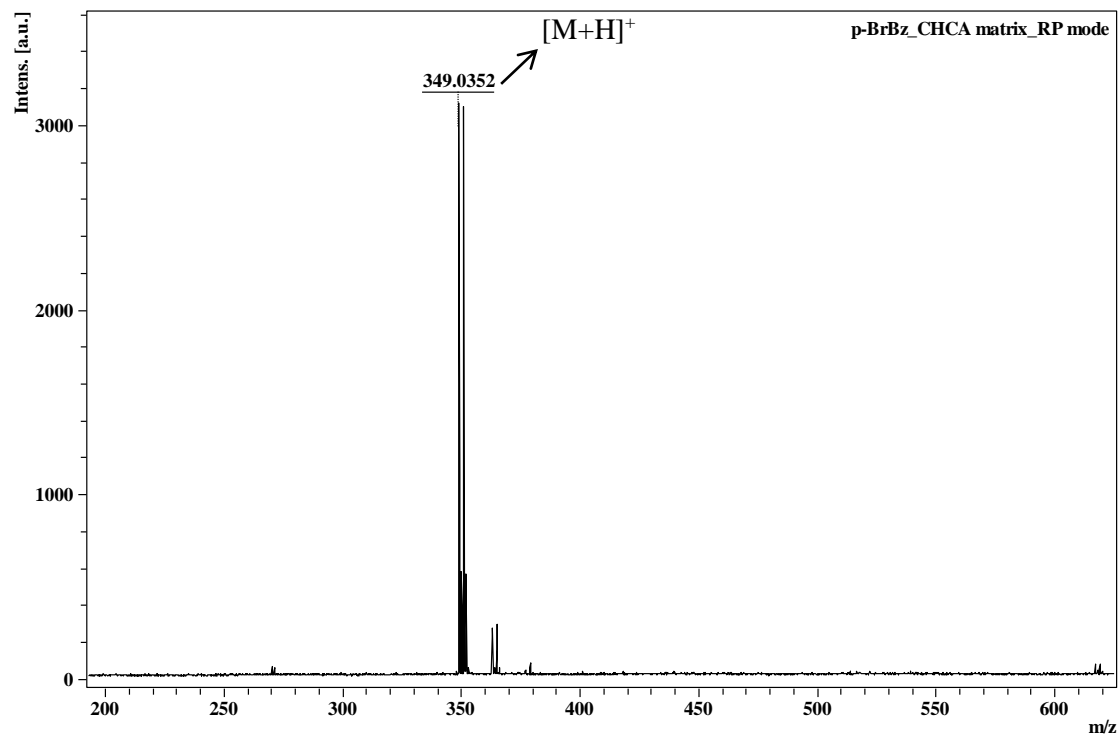

9-(2,2-diphenylvinyl)-9H-carbazole (**4**)

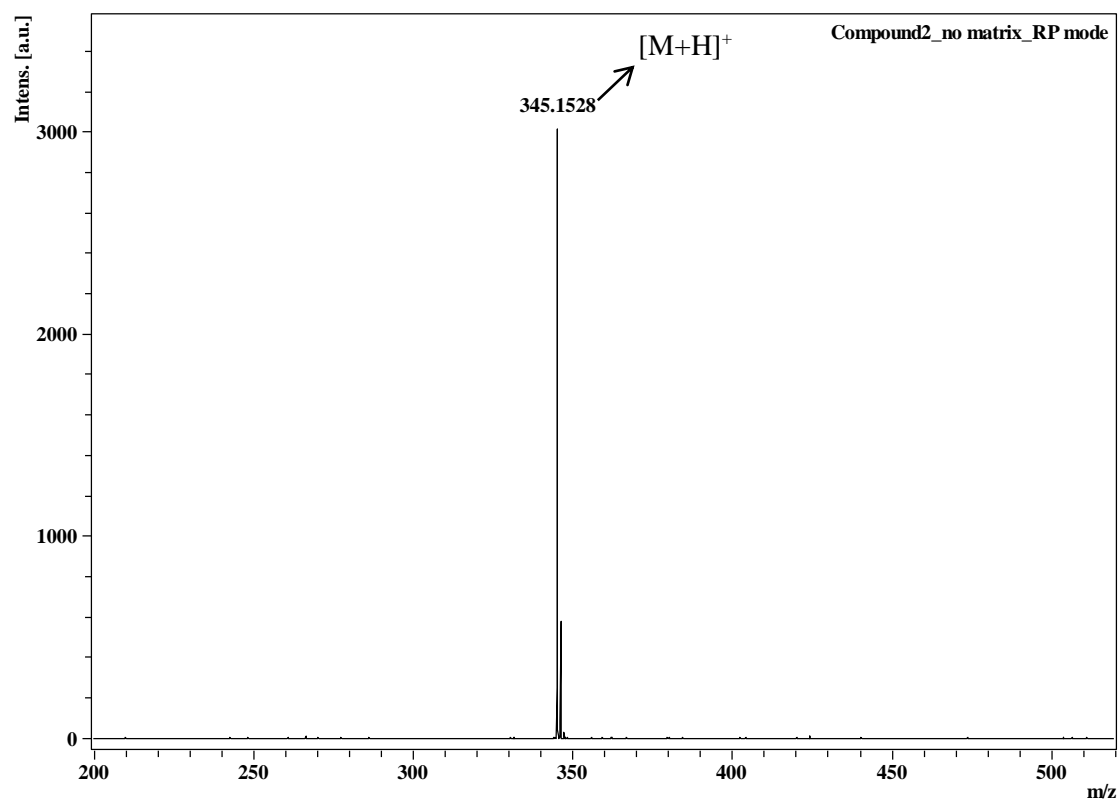

3-bromo-9-(2,2-diphenylvinyl)-9H-carbazole (**5**)

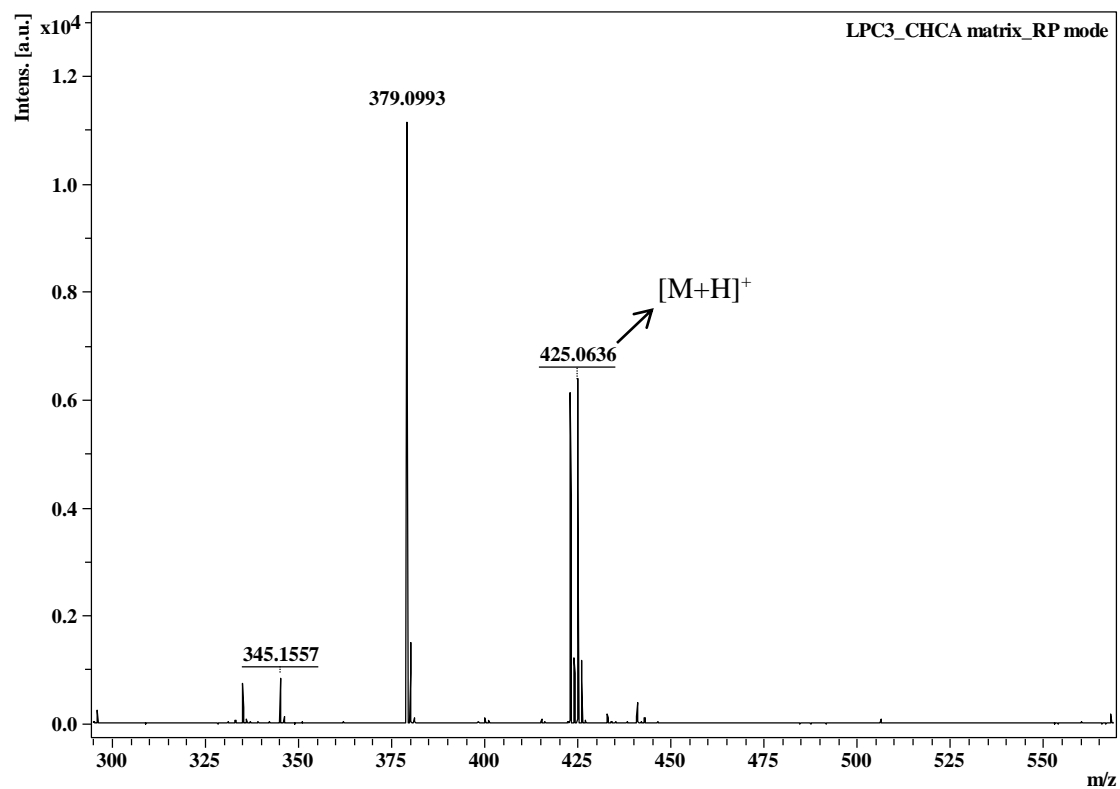

9-(2,2-diphenylvinyl)-3-(4,4,5,5-tetramethyl-1,3,2-dioxaborolan-2-yl)-9H-carbazole

(6)

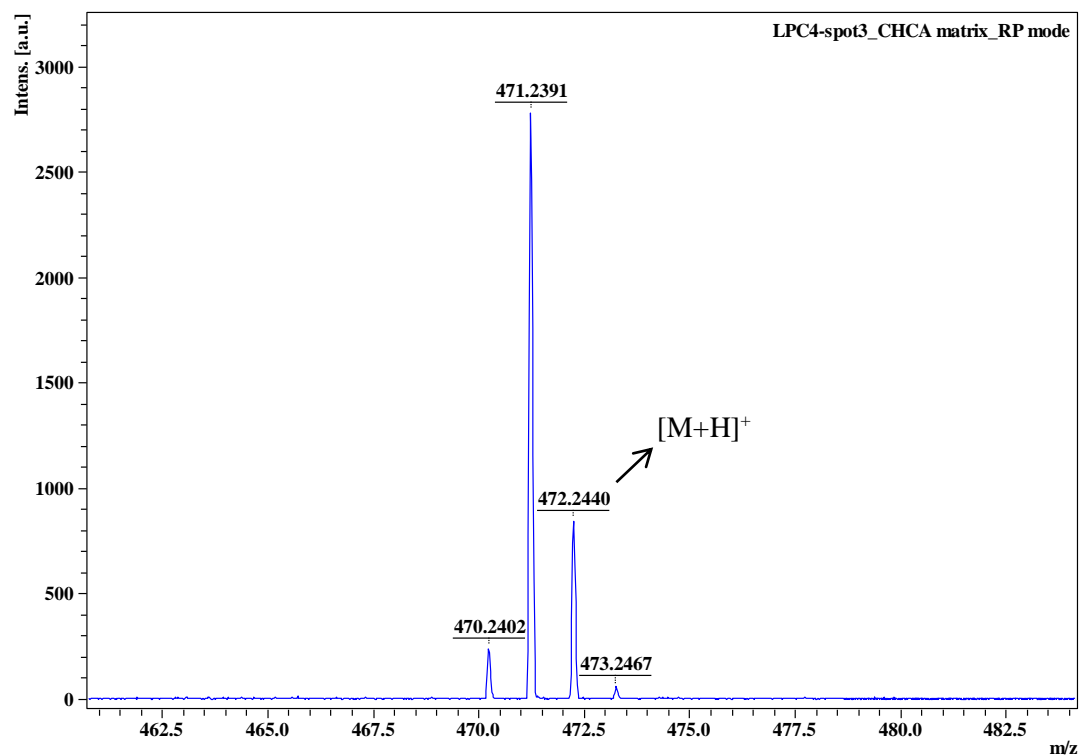

9-(2,2-diphenylvinyl)-3-(2-(1-phenyl-1H-benzo[d]imidazol-2-yl)phenyl)-9H-carbazole (*o*-BzcDPE)

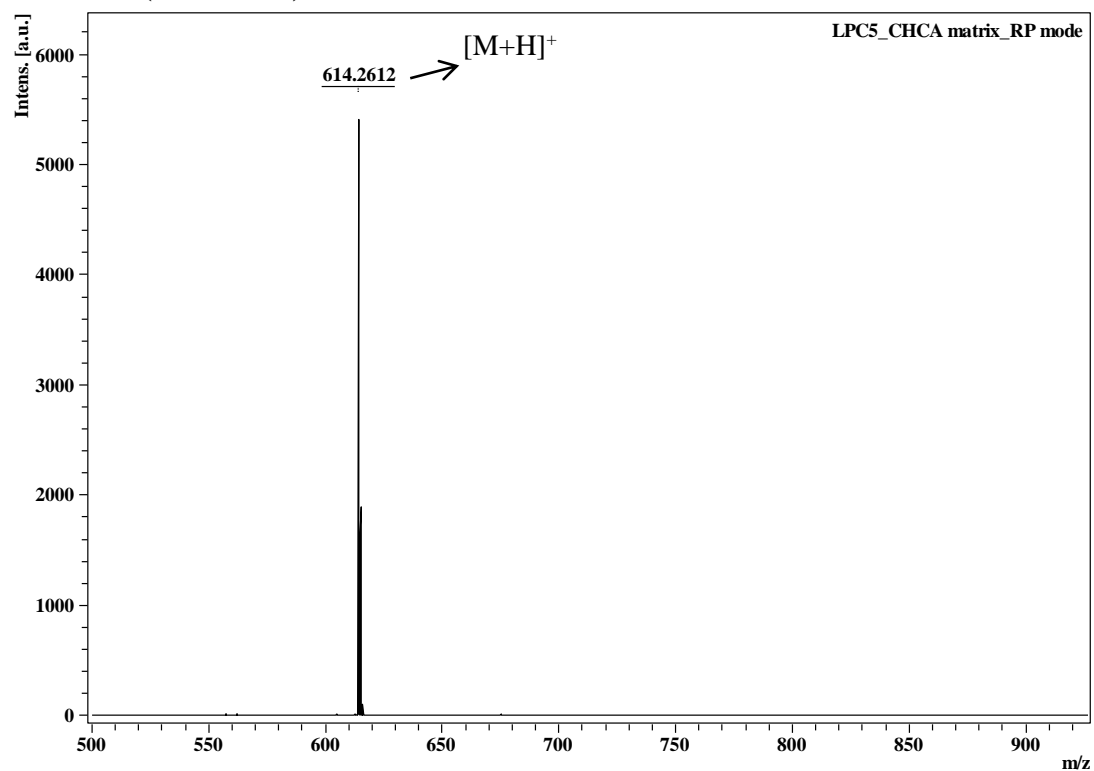

9-(2,2-diphenylvinyl)-3-(4-(1-phenyl-1H-benzo[d]imidazol-2-yl)phenyl)-9H-carbazole (*p*-BzcDPE)

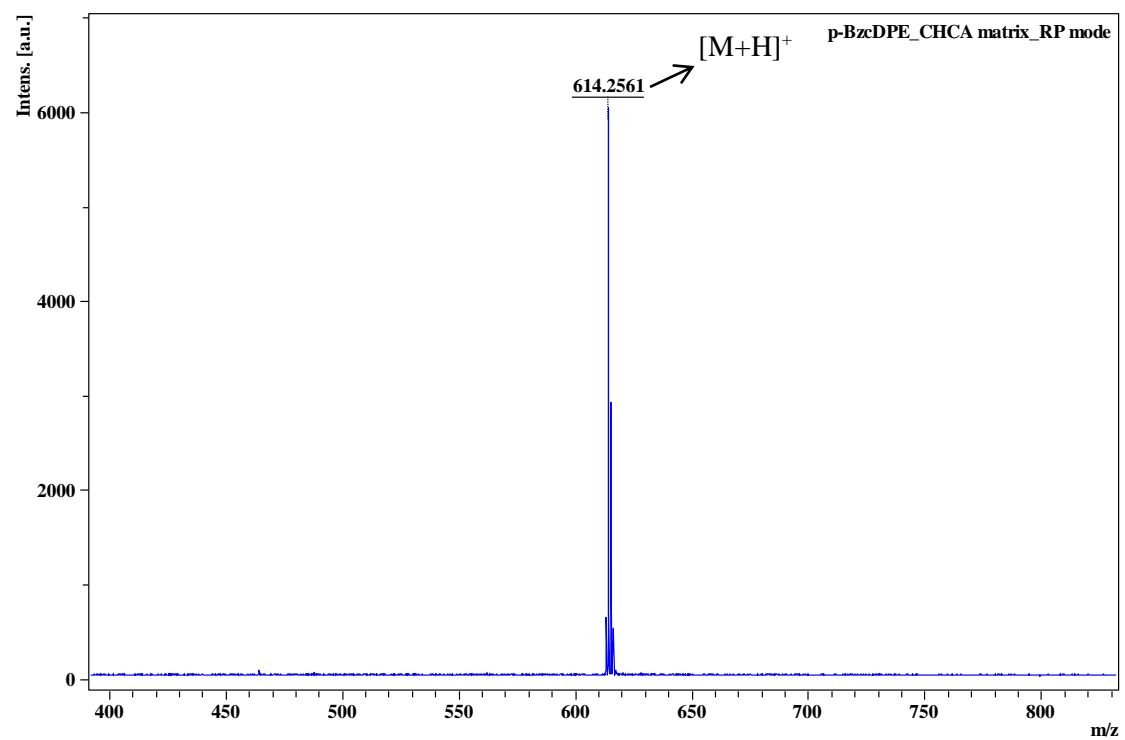

**Crystal data of *o*-BzcDPE, *p*-BzcDPE, and *p*-BzcDPE+HCl****Table S1**Crystal data and structure refinement for *p*-BzcDPE.

---

|                                   |                                                                                                                        |
|-----------------------------------|------------------------------------------------------------------------------------------------------------------------|
| Empirical formula                 | C <sub>45</sub> H <sub>31</sub> N <sub>3</sub>                                                                         |
| Formula weight                    | 613.73                                                                                                                 |
| Crystal system                    | Triclinic                                                                                                              |
| Space group                       | P-1                                                                                                                    |
| Unit cell dimensions              | a = 8.9933(13) Å      α = 82.180(12)°<br>b = 9.9705(15) Å      β = 81.467(12)°<br>c = 19.962(3) Å      γ = 63.224(14)° |
| Volume                            | 1575.5(4) Å <sup>3</sup>                                                                                               |
| Z                                 | 2                                                                                                                      |
| F(000)                            | 644                                                                                                                    |
| Density (calculated)              | 1.294 Mg/m <sup>3</sup>                                                                                                |
| Wavelength                        | 0.71073 Å                                                                                                              |
| Cell parameters reflections used  | 2837                                                                                                                   |
| Theta range for Cell parameters   | 3.7430 to 29.3880°.                                                                                                    |
| Absorption coefficient            | 0.076 mm <sup>-1</sup>                                                                                                 |
| Temperature                       | 200(2) K                                                                                                               |
| Crystal size                      | 0.25 x 0.20 x 0.15 mm <sup>3</sup>                                                                                     |
|                                   | Data collection                                                                                                        |
| Diffractometer                    | Xcalibur, Atlas, Gemini                                                                                                |
| Absorption correction             | Semi-empirical from equivalents                                                                                        |
| Max. and min. transmission        | 1.00000 and 0.82855                                                                                                    |
| No. of measured reflections       | 10313                                                                                                                  |
| No. of independent reflections    | 10313 [R(int) = 0.1505]                                                                                                |
| No. of observed [I>2_igma(I)]     | 6857                                                                                                                   |
| Completeness to theta = 25.242°   | 99.8 %                                                                                                                 |
| Theta range for data collection   | 2.844 to 27.498°.                                                                                                      |
|                                   | Refinement                                                                                                             |
| Final R indices [I>2sigma(I)]     | R1 = 0.0741, wR2 = 0.1969                                                                                              |
| R indices (all data)              | R1 = 0.1110, wR2 = 0.2208                                                                                              |
| Goodness-of-fit on F <sup>2</sup> | 1.356                                                                                                                  |
| No. of reflections                | 10313                                                                                                                  |
| No. of parameters                 | 434                                                                                                                    |
| No. of restraints                 | 0                                                                                                                      |
| Largest diff. peak and hole       | 0.304 and -0.352 e.Å <sup>-3</sup>                                                                                     |

**Table S2**

Crystal data and structure refinement for *p*-**BzcDPE+HCl** (The solvent disorder was squeezed by the program. PLATON.)

---

|                                   |                                                  |                  |
|-----------------------------------|--------------------------------------------------|------------------|
| Empirical formula                 | C <sub>45</sub> H <sub>32</sub> ClN <sub>3</sub> |                  |
| Formula weight                    | 650.18                                           |                  |
| Crystal system                    | Triclinic                                        |                  |
| Space group                       | P-1                                              |                  |
| Unit cell dimensions              | a = 9.1375(11) Å                                 | α = 77.293(8)°.  |
|                                   | b = 11.3158(13) Å                                | β = 86.737(8)°.  |
|                                   | c = 18.3796(13) Å                                | γ = 81.617(10)°. |
| Volume                            | 1833.5(3) Å <sup>3</sup>                         |                  |
| Z                                 | 2                                                |                  |
| F(000)                            | 680                                              |                  |
| Density (calculated)              | 1.178 Mg/m <sup>3</sup>                          |                  |
| Wavelength                        | 0.71073 Å                                        |                  |
| Cell parameters reflections used  | 5155                                             |                  |
| Theta range for Cell parameters   | 3.3080 to 31.8950°.                              |                  |
| Absorption coefficient            | 0.139 mm <sup>-1</sup>                           |                  |
| Temperature                       | 100(2) K                                         |                  |
| Crystal size                      | 0.20 x 0.20 x 0.15 mm <sup>3</sup>               |                  |
|                                   | Data collection                                  |                  |
| Diffractometer                    | Xcalibur, Atlas, Gemini                          |                  |
| Absorption correction             | Semi-empirical from equivalents                  |                  |
| Max. and min. transmission        | 1.00000 and 0.40975                              |                  |
| No. of measured reflections       | 18358                                            |                  |
| No. of independent reflections    | 8411 [R(int) = 0.0751]                           |                  |
| No. of observed [I > 2_σ(I)]      | 5417                                             |                  |
| Completeness to theta = 25.242°   | 99.8 %                                           |                  |
| Theta range for data collection   | 3.120 to 27.499°.                                |                  |
|                                   | Refinement                                       |                  |
| Final R indices [I > 2σ(I)]       | R1 = 0.0685, wR2 = 0.1694                        |                  |
| R indices (all data)              | R1 = 0.1042, wR2 = 0.2063                        |                  |
| Goodness-of-fit on F <sup>2</sup> | 1.024                                            |                  |
| No. of reflections                | 8411                                             |                  |
| No. of parameters                 | 473                                              |                  |
| No. of restraints                 | 372                                              |                  |
| Largest diff. peak and hole       | 0.608 and -0.830 e.Å <sup>-3</sup>               |                  |

**Table S3**Crystal data and structure refinement for ***o*-BzcdPE**.

---

|                                   |                                                                                                                      |
|-----------------------------------|----------------------------------------------------------------------------------------------------------------------|
| Empirical formula                 | C <sub>45</sub> H <sub>31</sub> N <sub>3</sub>                                                                       |
| Formula weight                    | 613.73                                                                                                               |
| Crystal system                    | Triclinic                                                                                                            |
| Space group                       | P-1                                                                                                                  |
| Unit cell dimensions              | a = 9.7546(3) Å      α = 97.964(2)°<br>b = 10.8555(3) Å      β = 92.592(2)°<br>c = 17.1955(5) Å      γ = 115.717(3)° |
| Volume                            | 1613.31(9) Å <sup>3</sup>                                                                                            |
| Z                                 | 2                                                                                                                    |
| F(000)                            | 644                                                                                                                  |
| Density (calculated)              | 1.263 Mg/m <sup>3</sup>                                                                                              |
| Wavelength                        | 0.71073 Å                                                                                                            |
| Cell parameters reflections used  | 3529                                                                                                                 |
| Theta range for Cell parameters   | 3.4370 to 27.3820°.                                                                                                  |
| Absorption coefficient            | 0.074 mm <sup>-1</sup>                                                                                               |
| Temperature                       | 100(2) K                                                                                                             |
| Crystal size                      | 0.20 x 0.15 x 0.10 mm <sup>3</sup>                                                                                   |
|                                   | Data collection                                                                                                      |
| Diffractometer                    | Xcalibur, Atlas, Gemini                                                                                              |
| Absorption correction             | Semi-empirical from equivalents                                                                                      |
| Max. and min. transmission        | 1.00000 and 0.94534                                                                                                  |
| No. of measured reflections       | 13449                                                                                                                |
| No. of independent reflections    | 7149 [R(int) = 0.0430]                                                                                               |
| No. of observed [I > 2σ(I)]       | 4255                                                                                                                 |
| Completeness to theta = 25.242°   | 99.8 %                                                                                                               |
| Theta range for data collection   | 2.913 to 27.499°.                                                                                                    |
|                                   | Refinement                                                                                                           |
| Final R indices [I > 2σ(I)]       | R1 = 0.0603, wR2 = 0.1235                                                                                            |
| R indices (all data)              | R1 = 0.1208, wR2 = 0.1658                                                                                            |
| Goodness-of-fit on F <sup>2</sup> | 0.924                                                                                                                |
| No. of reflections                | 7149                                                                                                                 |
| No. of parameters                 | 433                                                                                                                  |
| No. of restraints                 | 0                                                                                                                    |
| Largest diff. peak and hole       | 0.275 and -0.244 e.Å <sup>-3</sup>                                                                                   |



### NMR spectra assignments of *o*-BzcDPE

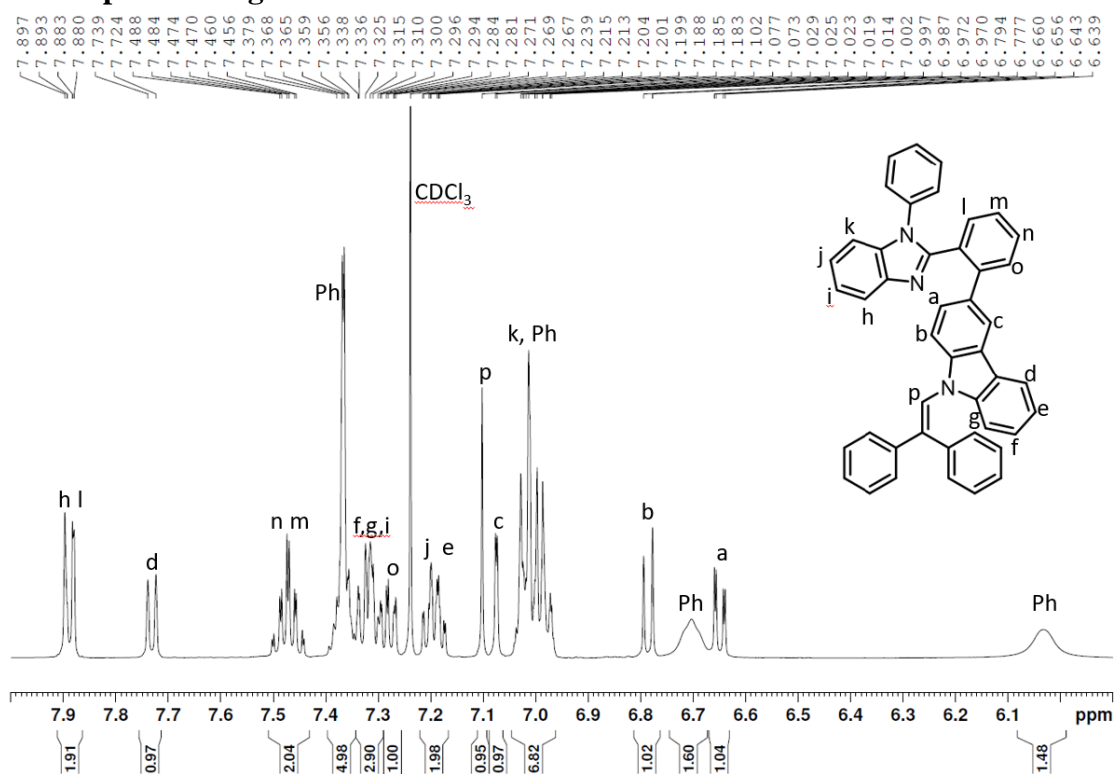

Fig. S1. <sup>1</sup>H NMR spectra assignments of *o*-BzcDPE

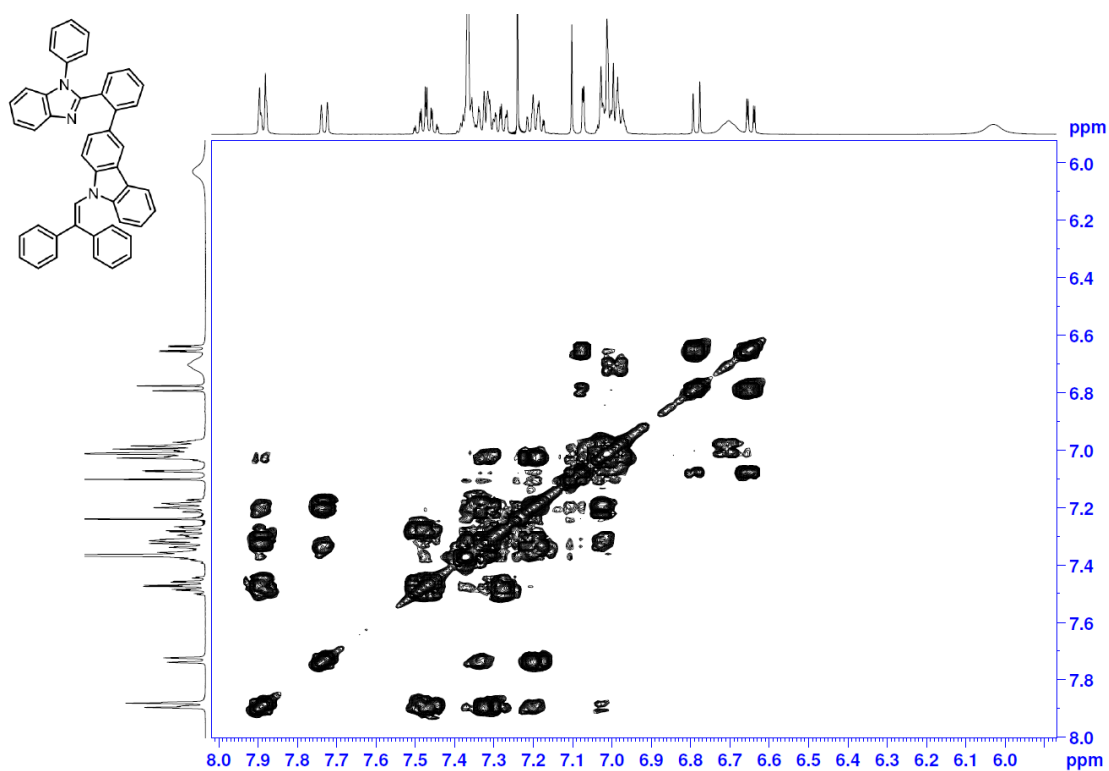

Fig. S2. <sup>1</sup>H-<sup>1</sup>H COSY NMR spectra of *o*-BzcDPE

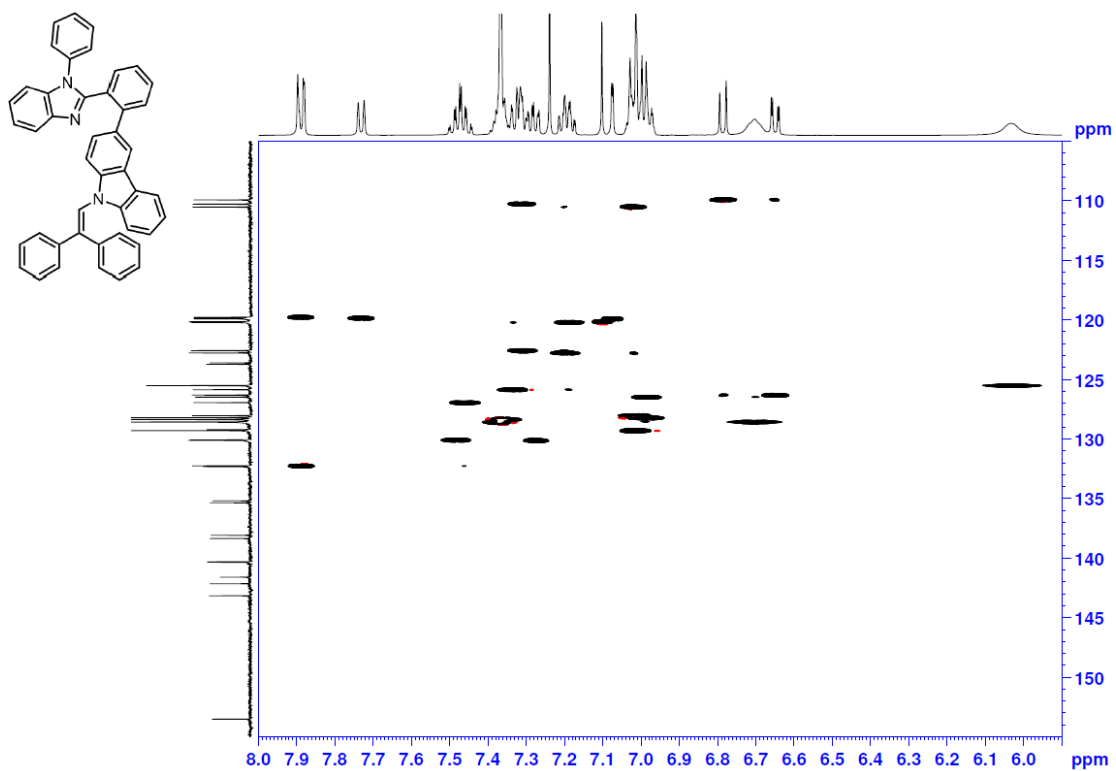

**Fig. S3.** HSQC NMR spectra of *o*-BzcDPE

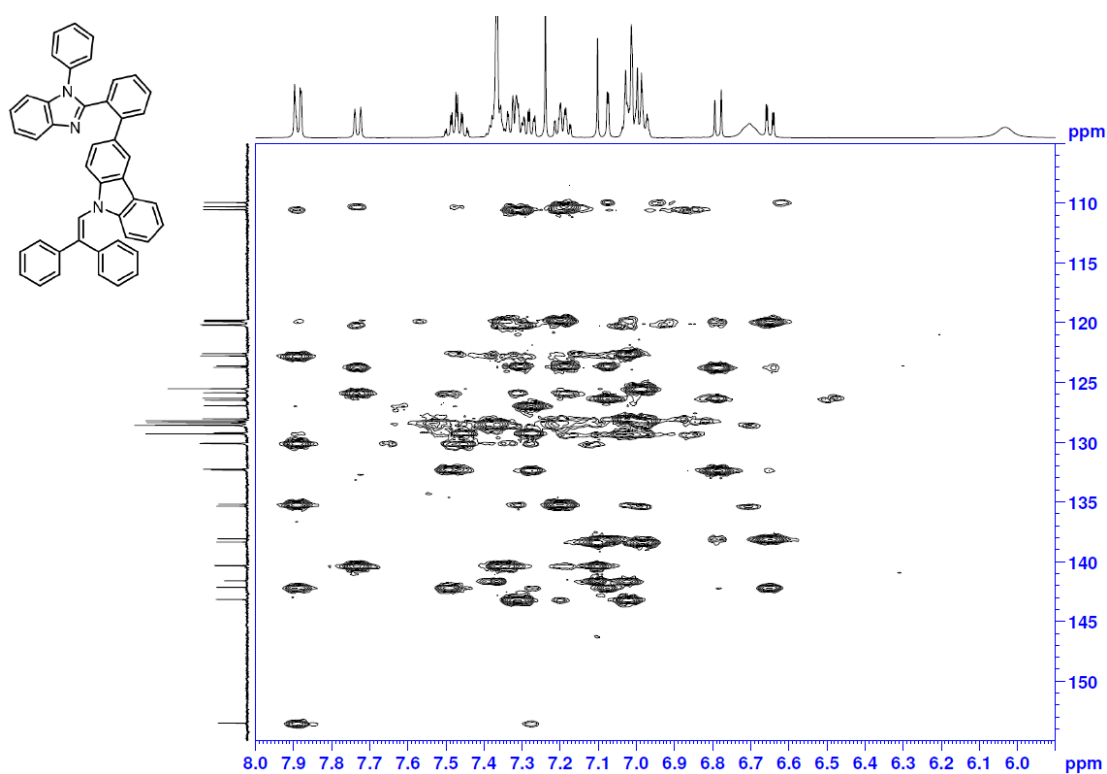

**Fig. S4.** HMBC NMR spectra of *o*-BzcDPE

### Oscillator strength data for DFT studies

All calculations were performed using the parameters in toluene. The structures of *o*-BzcDPE, *p*-BzcDPE and *o*-BzcDPE+H<sup>+</sup> Cl<sup>-</sup> were optimized using the described DFT routines. The calculated spectral transitions of *p*-BzcDPE+H<sup>+</sup> Cl<sup>-</sup> are based on the crystallographic structure provided in this paper. All the first major electronic transitions with reasonable oscillator strength (*f*) arise from the HOMO to LUMO transitions.

**Table S4**

|                                              | Electronic transition           | $\lambda_{\text{abs}}$ (nm) | $E_{\text{ex}}$ (eV) | Oscillator strength, <i>f</i> | Major contributions <sup>a</sup>          |
|----------------------------------------------|---------------------------------|-----------------------------|----------------------|-------------------------------|-------------------------------------------|
| <i>o</i> -BzcDPE <sup>b</sup>                | S <sub>0</sub> → S <sub>1</sub> | 360.68                      | 3.4376               | 0.5125                        | H → L (70%)                               |
|                                              | S <sub>0</sub> → S <sub>2</sub> | 331.78                      | 3.7369               | 0.0522                        | H → L+1 (69%)                             |
|                                              | S <sub>0</sub> → S <sub>3</sub> | 324.24                      | 3.8238               | 0.0098                        | H → L+2 (68%)                             |
| <i>p</i> -BzcDPE <sup>b</sup>                | S <sub>0</sub> → S <sub>1</sub> | 367.79                      | 3.3711               | 0.9031                        | H → L (67%), H → L+1 (-20%)               |
|                                              | S <sub>0</sub> → S <sub>2</sub> | 341.37                      | 3.6320               | 0.4355                        | H → L (20%), H → L+1 (66%)                |
|                                              | S <sub>0</sub> → S <sub>3</sub> | 327.03                      | 3.7913               | 0.0262                        | H → L+2 (65%)                             |
| <i>o</i> -BzcDPE+H <sup>+</sup> <sup>c</sup> | S <sub>0</sub> → S <sub>1</sub> | 381.67                      | 3.2485               | 0.1747                        | H → L (69%)                               |
|                                              | S <sub>0</sub> → S <sub>2</sub> | 357.15                      | 3.4715               | 0.2955                        | H → L+1 (69%)                             |
|                                              | S <sub>0</sub> → S <sub>3</sub> | 346.80                      | 3.5751               | 0.0021                        | H-2 → L (34%), H-1 → L (62%)              |
| <i>p</i> -BzcDPE+H <sup>+</sup> <sup>c</sup> | S <sub>0</sub> → S <sub>1</sub> | 454.59                      | 2.7274               | 0.0465                        | H-2 → L (21%), H-1 → L (65%), H → L (19%) |
|                                              | S <sub>0</sub> → S <sub>2</sub> | 451.93                      | 2.7435               | 0.0104                        | H-2 → L (67%), H-1 → L (-20%)             |
|                                              | S <sub>0</sub> → S <sub>3</sub> | 445.74                      | 2.7816               | 0.6438                        | H-1 → L (-20%), H → L (67%)               |

<sup>a</sup> H = HOMO; L = LUMO; only contributions above 15% are included.

<sup>b</sup> Calculated by TD-DFT//B3LYP/6-31G (d)

<sup>c</sup> Calculated by TD-DFT//B3LYP/6-31+G (d)

**UV-Vis absorption of *o*-BzcdPE, *p*-BzcdPE, *o*-BzcdPE+H<sup>+</sup>, and *p*-BzcdPE+H<sup>+</sup> in different solvents.**

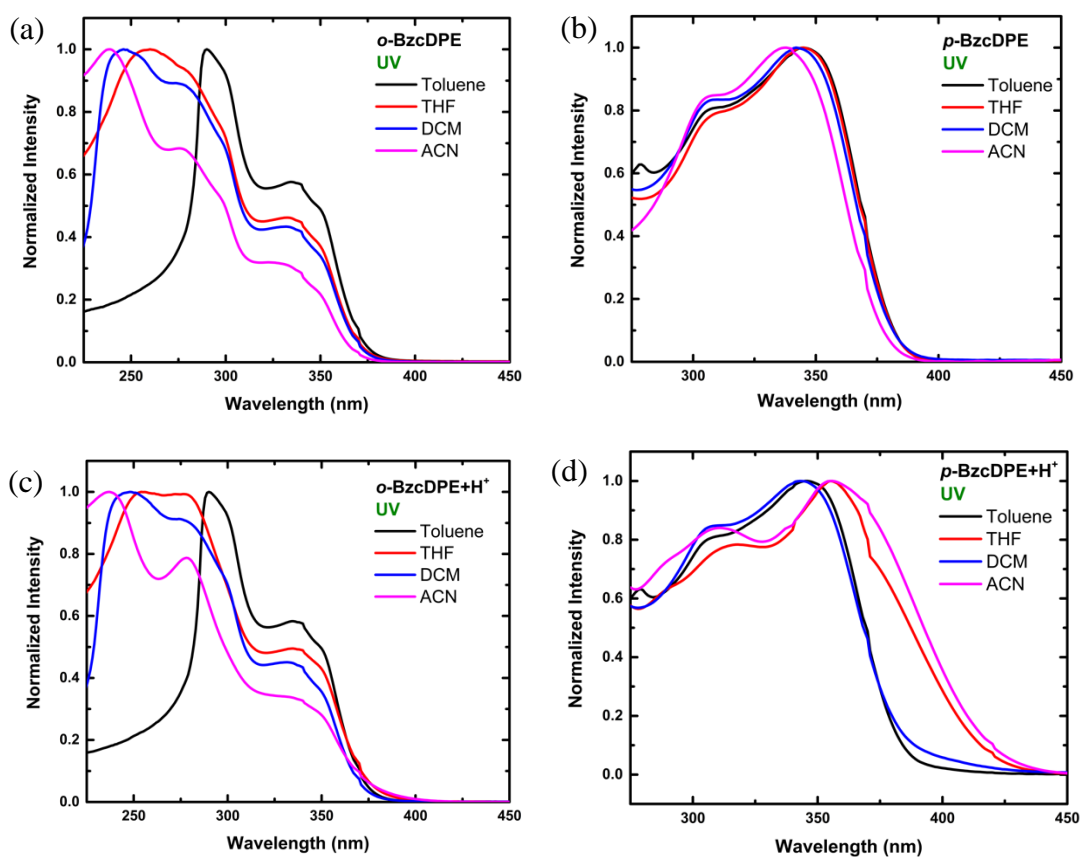

**Fig. S5.** UV-Vis absorption of (a) *o*-BzcdPE, (b) *p*-BzcdPE, (c) *o*-BzcdPE+H<sup>+</sup>, and (d) *p*-BzcdPE+H<sup>+</sup> in toluene, THF, DCM, and ACN (1 mM), respectively.

**Solvato-fluorochromism of *o*-BzcDPE, *p*-BzcDPE, *o*-BzcDPE+H<sup>+</sup>, and *p*-BzcDPE+H<sup>+</sup> in different solvents.**

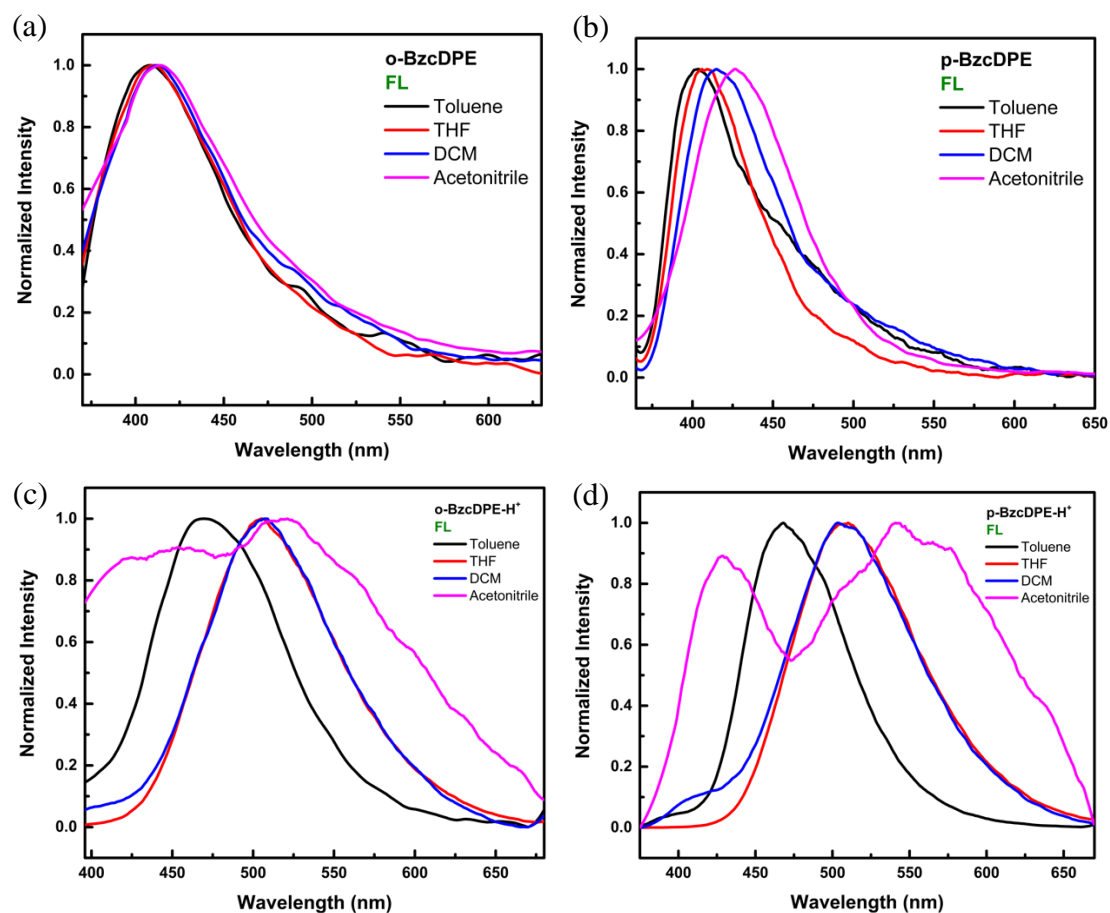

**Fig. S6.** Solvato-fluorochromism of (a) *o*-BzcDPE, (b) *p*-BzcDPE, (c) *o*-BzcDPE+H<sup>+</sup>, and (d) *p*-BzcDPE+H<sup>+</sup> in toluene, DCM, THF, and ACN (1 mM), respectively. The data are smoothed for better identification.

## Study of AIE phenomenon of *o*-BzcDPE

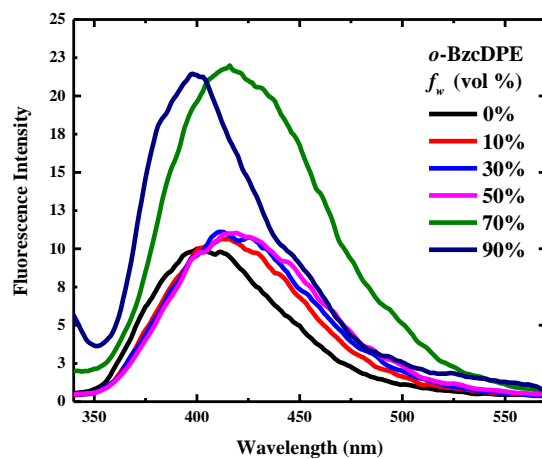

**Fig. S7.** Fluorescence spectra of *o*-BzcDPE ( $\lambda_{\text{ex}} = 320$  nm) at  $1.0 \times 10^{-4}$  M in THF-H<sub>2</sub>O mixture with  $f_w$  (vol%) : 0, 10, 30, 50, 70 and 90, respectively.

## Optical titration of sulfuric acid

**Table S5**

The preparation of solution for the spectrophotometric titration of sulfuric acid.

| The amount of sulfuric acid (ppm) | 3.0 mM of indicator (mL) | 3.0 mM of sulfuric solution (mL) | Toluene (mL) | Total volume (mL) |
|-----------------------------------|--------------------------|----------------------------------|--------------|-------------------|
| 0                                 | 1.00                     | 0                                | 2.00         | 3.00              |
| 15                                | 1.00                     | 0.15                             | 1.85         |                   |
| 29                                | 1.00                     | 0.30                             | 1.70         |                   |
| 44                                | 1.00                     | 0.45                             | 1.55         |                   |
| 59                                | 1.00                     | 0.60                             | 1.40         |                   |
| 74                                | 1.00                     | 0.75                             | 1.25         |                   |
| 88                                | 1.00                     | 0.90                             | 1.10         |                   |
| 104                               | 1.00                     | 1.05                             | 0.95         |                   |
| 118                               | 1.00                     | 1.20                             | 0.80         |                   |
| 132                               | 1.00                     | 1.35                             | 0.65         |                   |
| 147                               | 1.00                     | 1.50                             | 0.50         |                   |
| 162                               | 1.00                     | 1.65                             | 0.35         |                   |
| 177                               | 1.00                     | 1.80                             | 0.20         |                   |
| 191                               | 1.00                     | 1.95                             | 0.05         |                   |

### The calculation of the amount of sulfuric acid

In order to express the amount of sulfuric acid as parts per million (ppm), we assumed that the density of the mixed solution was 1.0 g/mL. Herein, we took 15 ppm for example, and the calculation method was shown below.

$$\frac{3 \text{ (mM) H}_2\text{SO}_4 \text{ toluene solution} \times 0.15 \text{ (mL)}}{3 \text{ (mL)}} = 0.15 \text{ (mM)} = 1.5 \times 10^{-4} \left( \frac{\text{mole}}{\text{L}} \right)$$
$$= 1.5 \times 10^{-4} \left( \frac{\text{mole}}{\text{kg}} \right) = 1.5 \times 10^{-4} \left( \frac{\text{mole}}{\text{kg}} \right) \times 98.08 \left( \frac{\text{g}}{\text{mole}} \right) = 14.712 \left( \frac{\text{mg}}{\text{kg}} \right) \approx 15 \text{ ppm}$$

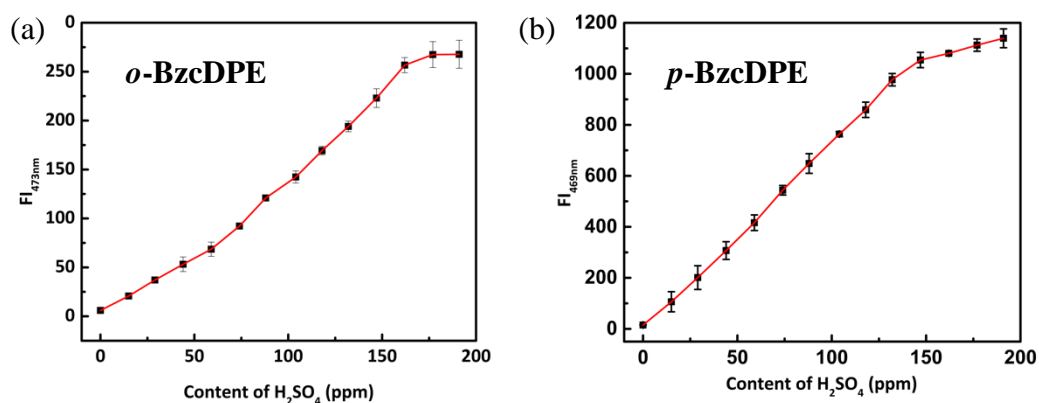

**Fig. S8.** Plots of the mean and standard deviation of (a)*o*-BzcdPE and (b)*p*-BzcdPE between fluorescence intensity and content of  $H_2SO_4$  after repeating the titration experiment three times.

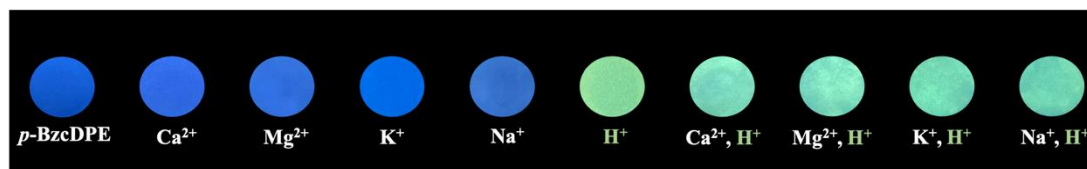

**Fig. S9.** The photograph of *p*-BzcdPE pre-stained filter paper in the presence of different cations solution (1 mM) only and coexisting with  $H^+$  (1 mM) under UV light (365 nm).

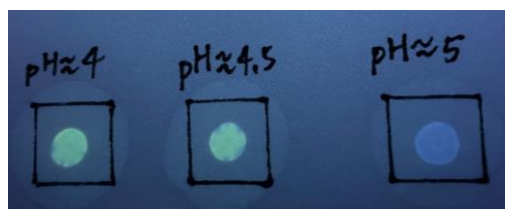

**Fig. S10.** The sensing performance of *p*-BzcdPE pre-stained filter paper with pH values ranging from 4 to 5 under UV light (365 nm).

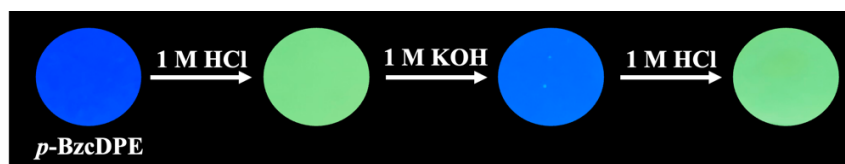

**Fig. S11.** Regeneration of *p*-BzcdPE pre-stained filter paper under UV light (365 nm).



## Optical titration of PFOA

**Table S6**

The preparation of solution for the spectrophotometric titration of PFOA.

| The concentration of PFOA(mM) | 15 mM of octanoic acid solution (mL) | 1.0 mM of PFOA solution (mL) | 1.0 mM of indicator (mL) | Toluene (mL) | Total volume (mL) |
|-------------------------------|--------------------------------------|------------------------------|--------------------------|--------------|-------------------|
| 0                             | 1.33                                 | 0                            | 0.10                     | 0.57         | 2.00              |
| 0.01                          | 1.33                                 | 0.02                         | 0.10                     | 0.55         |                   |
| 0.02                          | 1.33                                 | 0.04                         | 0.10                     | 0.53         |                   |
| 0.03                          | 1.33                                 | 0.06                         | 0.10                     | 0.51         |                   |
| 0.04                          | 1.33                                 | 0.08                         | 0.10                     | 0.49         |                   |
| 0.05                          | 1.33                                 | 0.10                         | 0.10                     | 0.47         |                   |
| 0.06                          | 1.33                                 | 0.12                         | 0.10                     | 0.45         |                   |
| 0.07                          | 1.33                                 | 0.14                         | 0.10                     | 0.43         |                   |
| 0.08                          | 1.33                                 | 0.16                         | 0.10                     | 0.41         |                   |
| 0.09                          | 1.33                                 | 0.18                         | 0.10                     | 0.39         |                   |
| 0.10                          | 1.33                                 | 0.20                         | 0.10                     | 0.37         |                   |

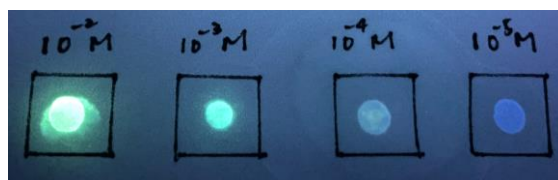

**Fig. S12.** Sensing performance of *p*-BzcdPE pre-stained filter paper in the presence of aqueous PFOA solutions with different concentration under UV light (365 nm).

Time response and stability tests of *o*-BzcDPE and *p*-BzcDPE under different acid conditions.

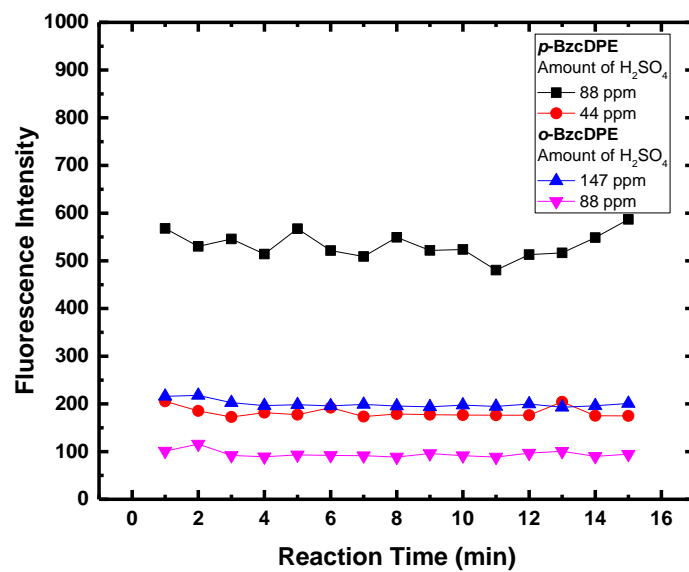

Fig. S13. The fluorescence intensity versus reaction time of *o*-BzcDPE (1 mM) and *p*-BzcDPE (1 mM) under different amounts of H<sub>2</sub>SO<sub>4</sub>.

**Quantum yield calculation and data of *o*-BzcDPE+H<sup>+</sup> and *p*-BzcDPE+H<sup>+</sup> in different solvent.**

Herein, we took coumarin 6 as the reference compound for our quantum yield measurement. According to related literature, the calculation method we used was shown below [4].

$$\Phi = \left[ \frac{A_s F_u n_u^2}{A_u F_s n_s^2} \right] \Phi_s$$

$\Phi$  = quantum yield (The quantum yield ( $\Phi_s$ ) for Coumarin 6 is 0.78 in EtOH)

s = coumarin 6

u = *o*-BzcDPE+H<sup>+</sup> or *p*-BzcDPE+H<sup>+</sup>

A = absorbance

F = emission peak area

n = refractive index

**Table. S7.** Quantum yield data of *o*-BzcDPE+H<sup>+</sup> in different solvents.

| Compound                        | Solvent | Absorbance (nm) | Emission peak (nm) | $\Phi$ (%) |
|---------------------------------|---------|-----------------|--------------------|------------|
| <i>o</i> -BzcDPE+H <sup>+</sup> | Toluene | 285-410         | 478                | 20.9       |
|                                 | THF     | 240-410         | 478                | 9.8        |
|                                 | DCM     | 235-410         | 510                | 3.3        |
|                                 | ACN     | 215-415         | 516                | 0.46       |

**Table. S8.** Quantum yield data of *p*-BzcDPE+H<sup>+</sup> in different solvents.

| Compound                        | Solvent | Absorbance (nm) | Emission peak (nm) | $\Phi$ (%) |
|---------------------------------|---------|-----------------|--------------------|------------|
| <i>p</i> -BzcDPE+H <sup>+</sup> | Toluene | 240-430         | 466                | 60.9       |
|                                 | THF     | 230-455         | 507                | 34.6       |
|                                 | DCM     | 220-430         | 515                | 21.2       |
|                                 | ACN     | 200-455         | 563                | 0.65       |

## Reference

- [1] Secci D, Bolasco A, D'Ascenzio M, Della Sala F, Yáñez M, Carradori S. Conventional and Microwave-Assisted Synthesis of Benzimidazole Derivatives and Their In Vitro Inhibition of Human Cyclooxygenase. *J Heterocycl Chem* 2012;49:1187-95.
- [2] Zhang G, Bai R-X, Li C-H, Feng C-G, Lin G-Q. Halogenation of 1,1-diarylethylenes by N-halosuccinimides. *Tetrahedron* 2019;75:1658-62.
- [3] Matoliukstyte A, Burbulis E, Grazulevicius JV, Gaidelis V, Jankauskas V. Carbazole-containing enamines as charge transport materials for electrophotography. *Synth Met* 2008;158:462-7.
- [4] Williams ATR, Winfield SA, Miller JN. Relative fluorescence quantum yields using a computer-controlled luminescence spectrometer. *Analyst* 1983;108:1067-71.
